# Supplementary material for: Global DNA dynamics of 8-oxoguanine repair by human OGG1 revealed by stopped-flow kinetics and molecular dynamics simulation
Source: Royal Society of Chemistry journal article supplement (doi:10.1039/c7mb00343a), 2017-07-14
Supplement: c7mb00343a4.pdf [file c7mb00343a4.pdf]

## Global DNA dynamics of 8-oxoguanine repair by human OGG1 revealed by stopped-flow kinetics and molecular dynamic simulation

M. V. Lukina, V. V. Koval, A. A. Lomzov, D. O. Zharkov, O. S. Fedorova

*Institute of Chemical Biology and Fundamental Medicine, Siberian Branch of the Russian Academy of Sciences, Lavrentyev Ave., 8, Novosibirsk 630090, Russia*

*Novosibirsk State University, Pirogov St., 2, Novosibirsk 630090, Russia*

### SUPPLEMENTARY MATERIALS

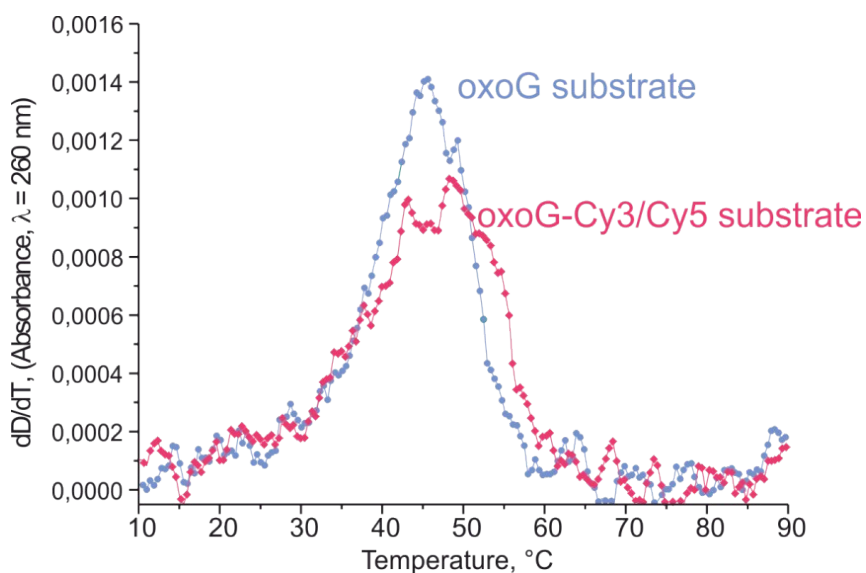

**Figure S1.** The thermodynamic melting curves for the **oxoG** and **oxoG-Cy3/Cy5** DNA duplexes

A

B

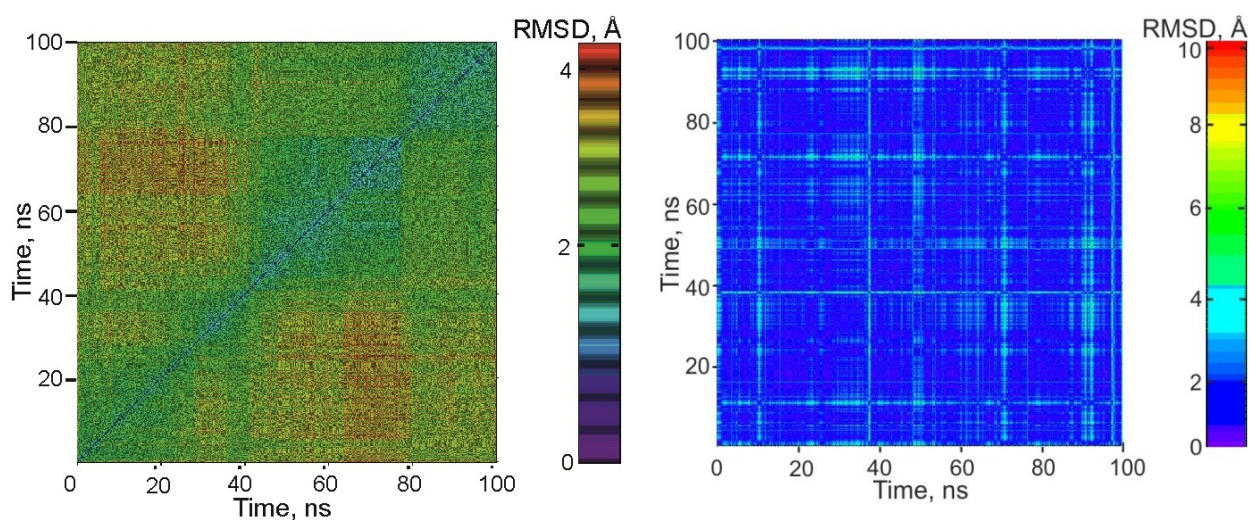

**Figure S2.** Two-dimensional RMSD plot of values calculated along a 100 ns trajectory for 8-oxoG and Cy3/Cy5 containing DNA in a complex with hOGG1 (A) and free DNA duplex (B). The x- and y-axes represent the MD simulation time in ns.

**Figure S3.** The MD movie for hOGG1 complex with DNA duplex containing Cy3/Cy5 FRET pair was captured during 100 ns trajectory playback

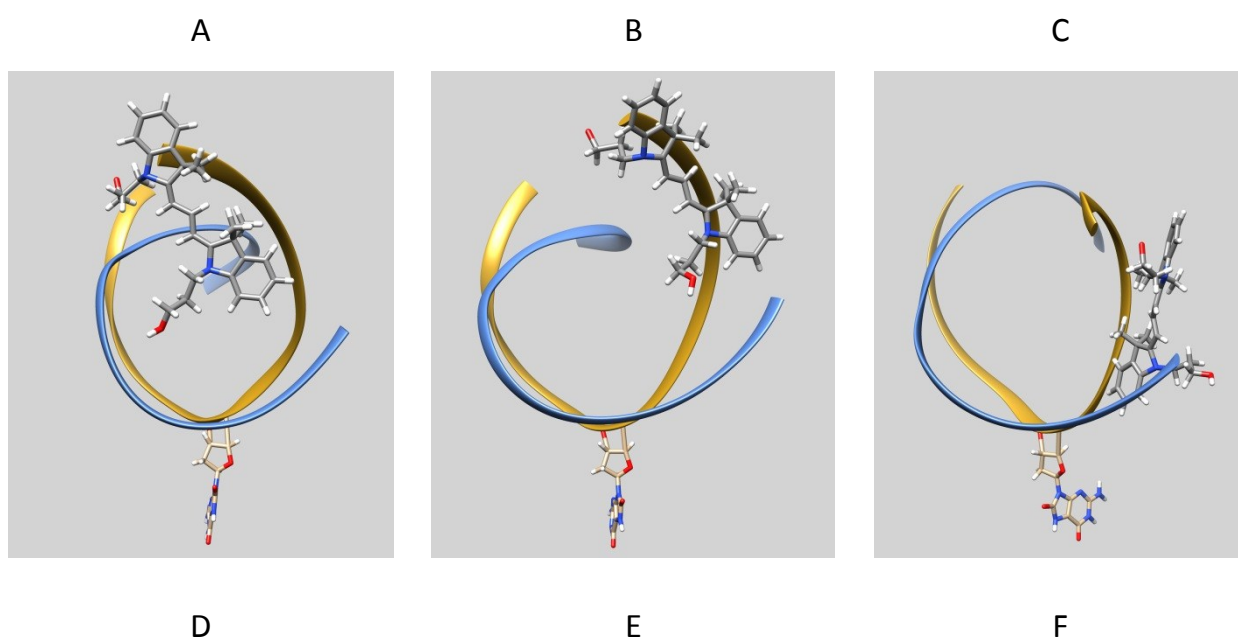

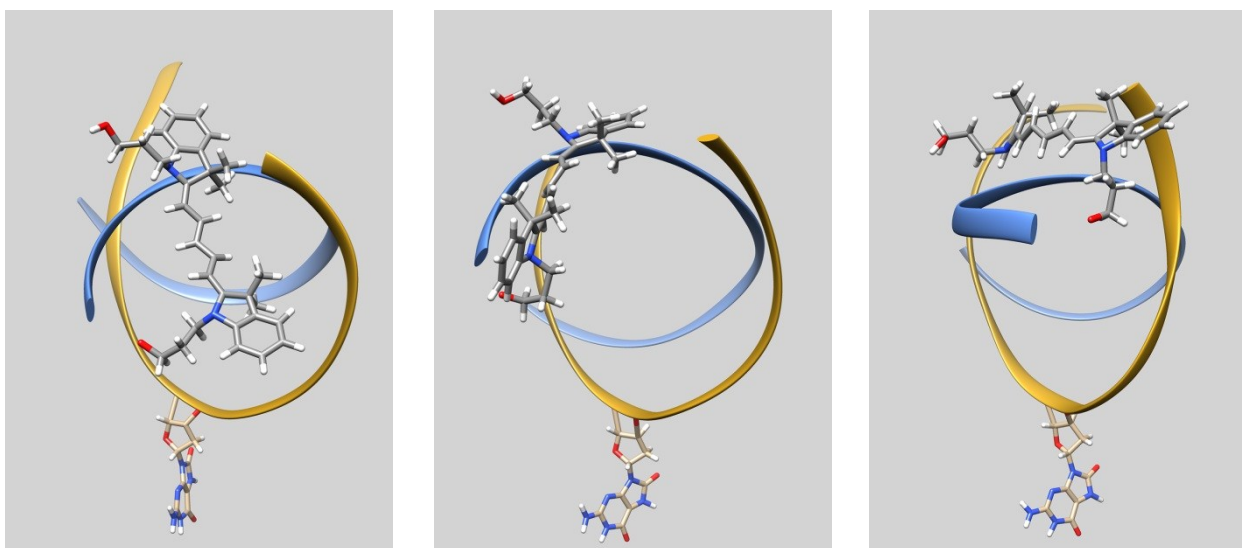

**FIGURE S4.** Typical snapshots of Cy3 (**A - C**) attached to 5' terminal T and Cy5 (**D - F**) attached to 5' terminal G on the duplex (8-oxoG displayed at the bottom of the DNA helix) in the complex with hOGG1 (not displayed): (**A, D**) primary base-stacked configuration, (**B, E**) unstacked configuration, (**C, F**) wandering dye.

**FIGURE S5.** The MD movie for DNA duplex containing Cy3/Cy5 FRET pair was captured during 100 ns trajectory playback.

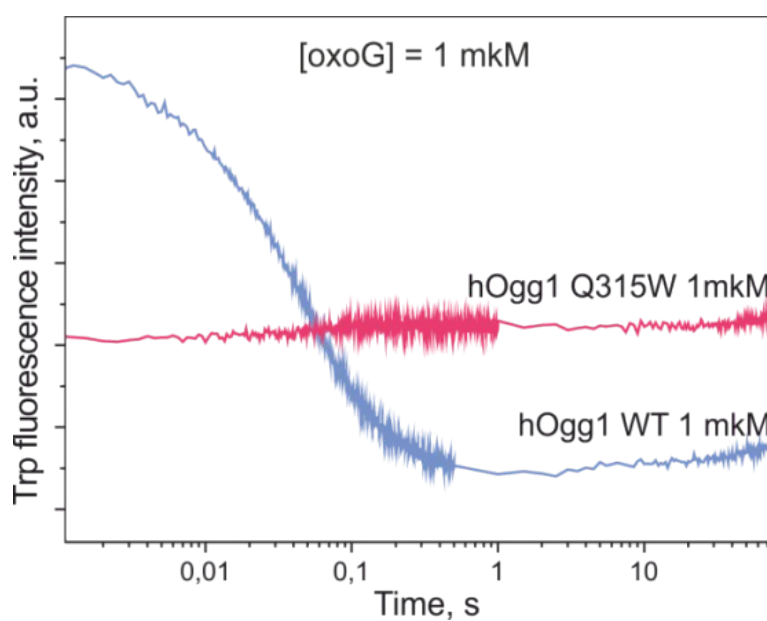

**FIGURE S6.** Comparison of the Trp fluorescence traces of interaction between 1  $\mu$ M oxoG DNA duplex and 1  $\mu$ M hOGG1 WT (blue line) or hOGG1 Q315 (pink line).

**FIGURE S7.** Active site amino acids dynamics for Q315W hOGG1 was captured during 100 ns MD trajectory playback.

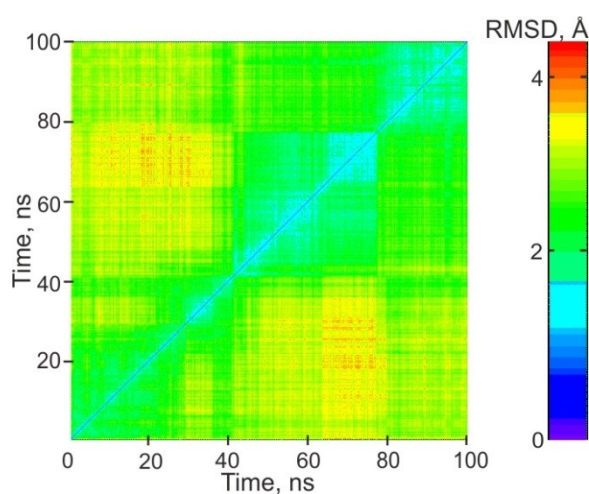

**FIGURE S8.** Two-dimensional RMSD plot of values calculated along a 100 ns trajectory for Q315W hOGG1 with 8-oxoG and Cy3/Cy5 containing DNA complex. The x- and y-axes represent the MD simulation time in ns.

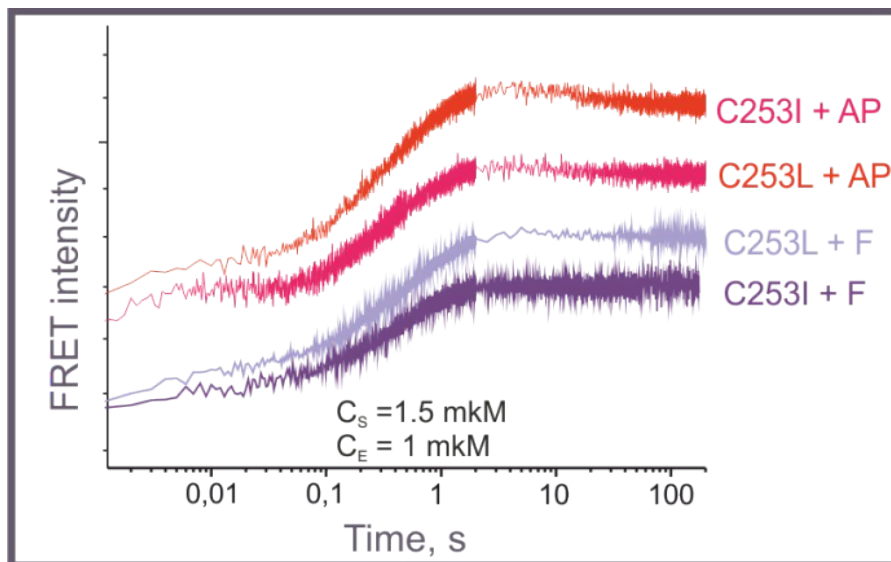

**FIGURE S9.** FRET traces of the time course of interaction between hOGG1 C253I and C253L with DNA contained natural AP-site or its synthetic analogue.
